# Supplementary material for: Monoamine Oxidase Inhibitory Constituents of Propolis: Kinetics and Mechanism of Inhibition of Recombinant Human MAO-A and MAO-B
Source: PubMed Central journal article supplement (PMC6271006; doi:10.3390/molecules191118936), 2014-11-18

# Supplementary

Figure S1. HPLC chromatogram of fractionation of dichloromethane extract of Propolis.

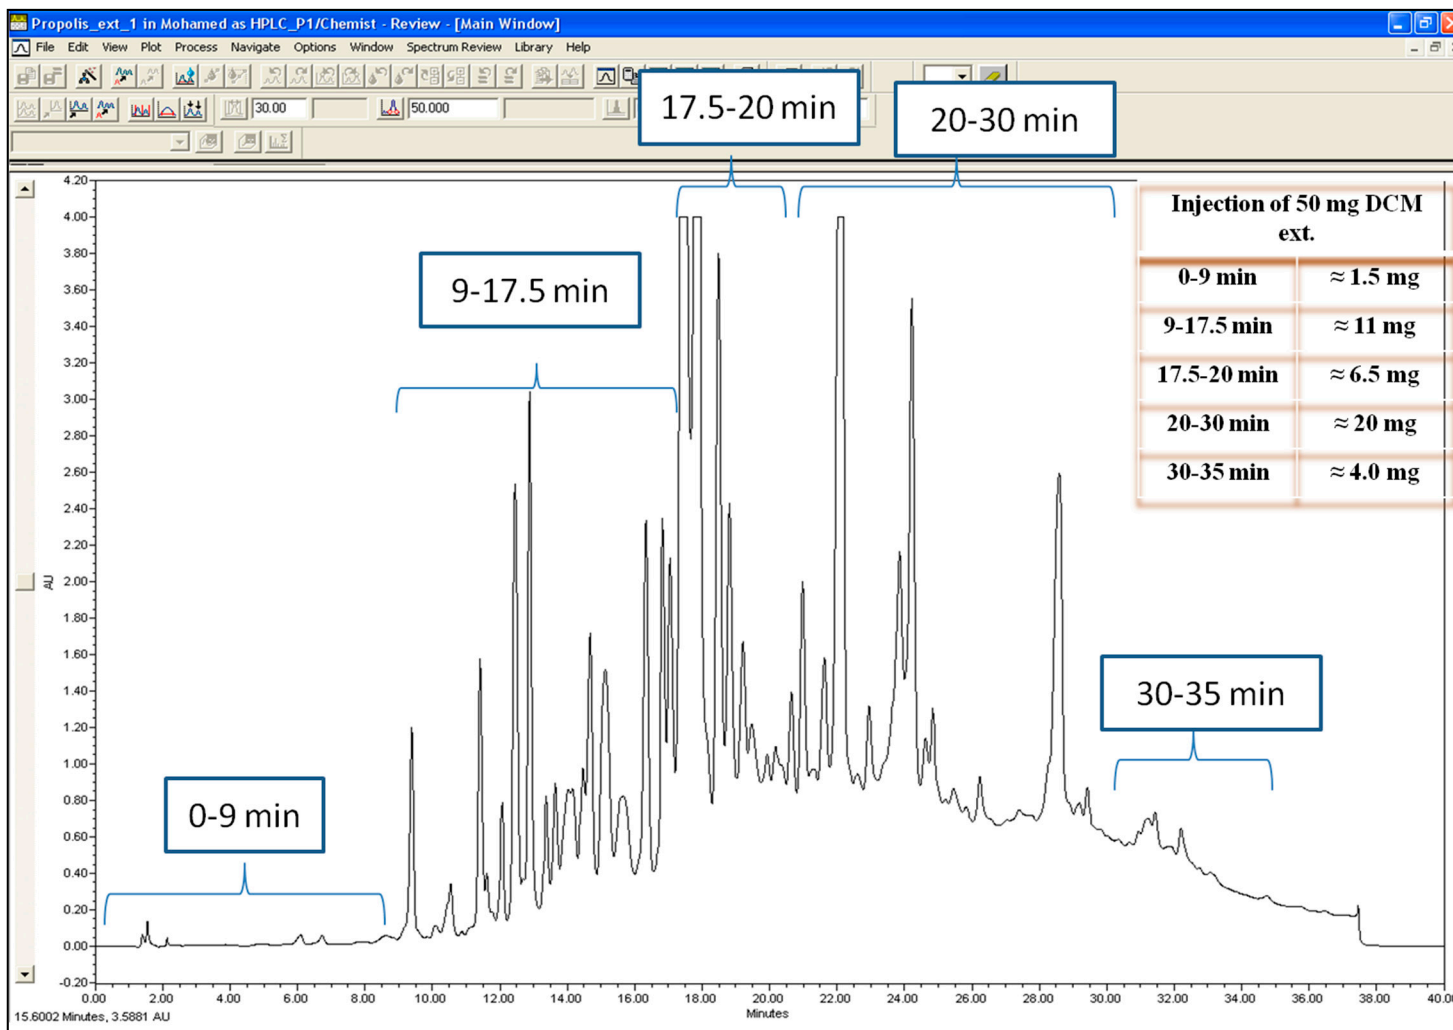

**Figure S2.** Identification of active constituents in Fraction 2 (15.5–20 min). **(A)** The HPLC chromatogram of the fractions, **(B)** The HPLC chromatogram of authentic reference standards. 1 (taxifolin, Tr 10 min), 2 (morin, Tr 12 min), 3 (quercetin, Tr 12.8 min), 4 (fisetin, Tr 13.5 min), 5 (apigenin, Tr 15.0 min), and 6 (galangin, Tr 18.0 min).

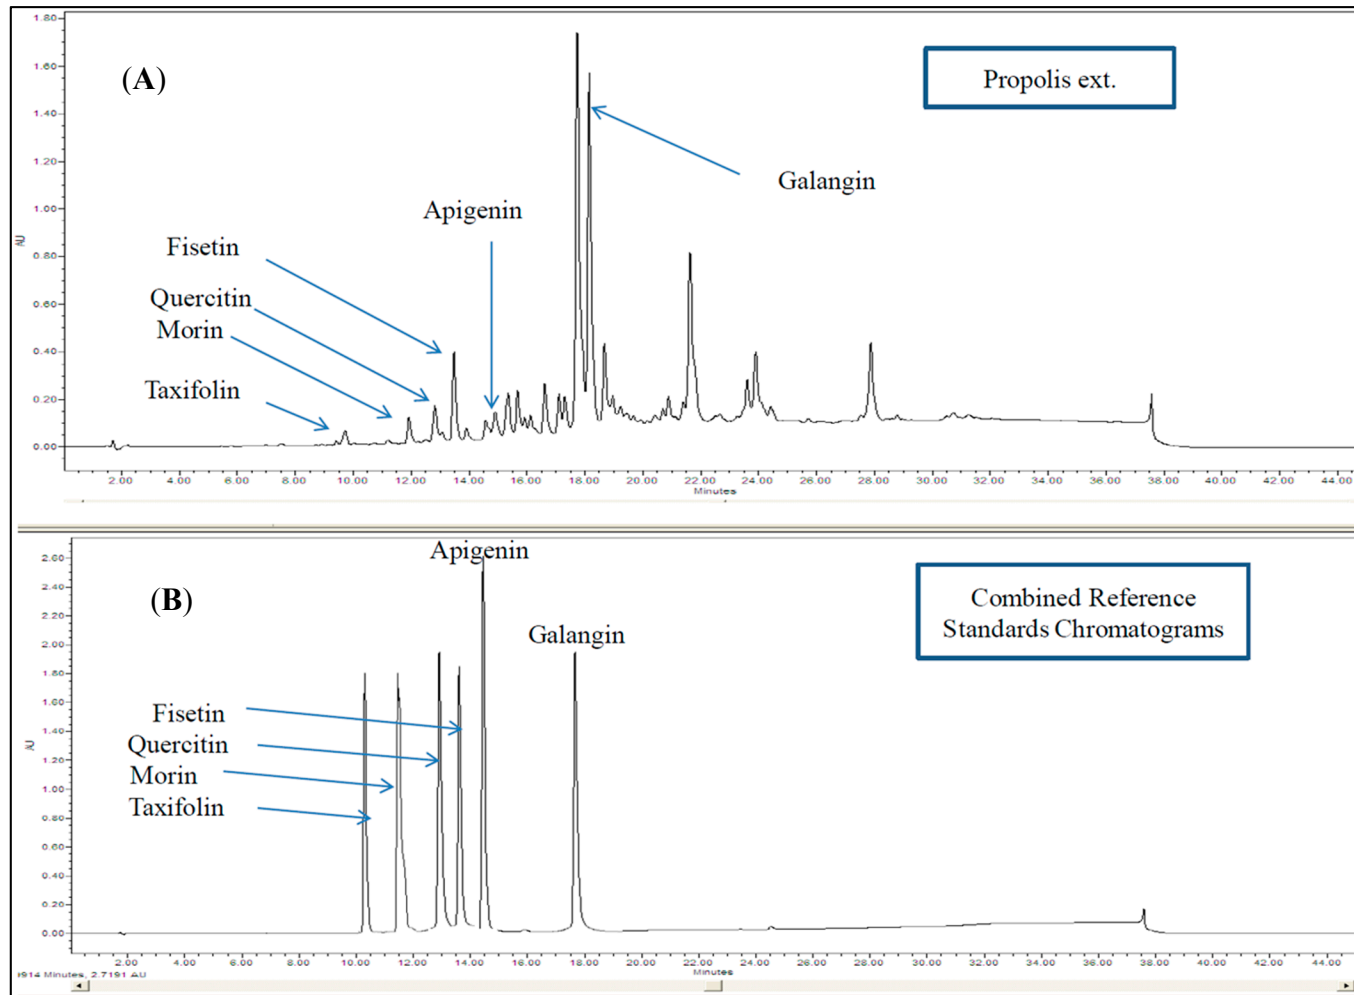

**Figure S3.** Individual HPLC chromatograms for Apigenin, Morin and Taxifolin.

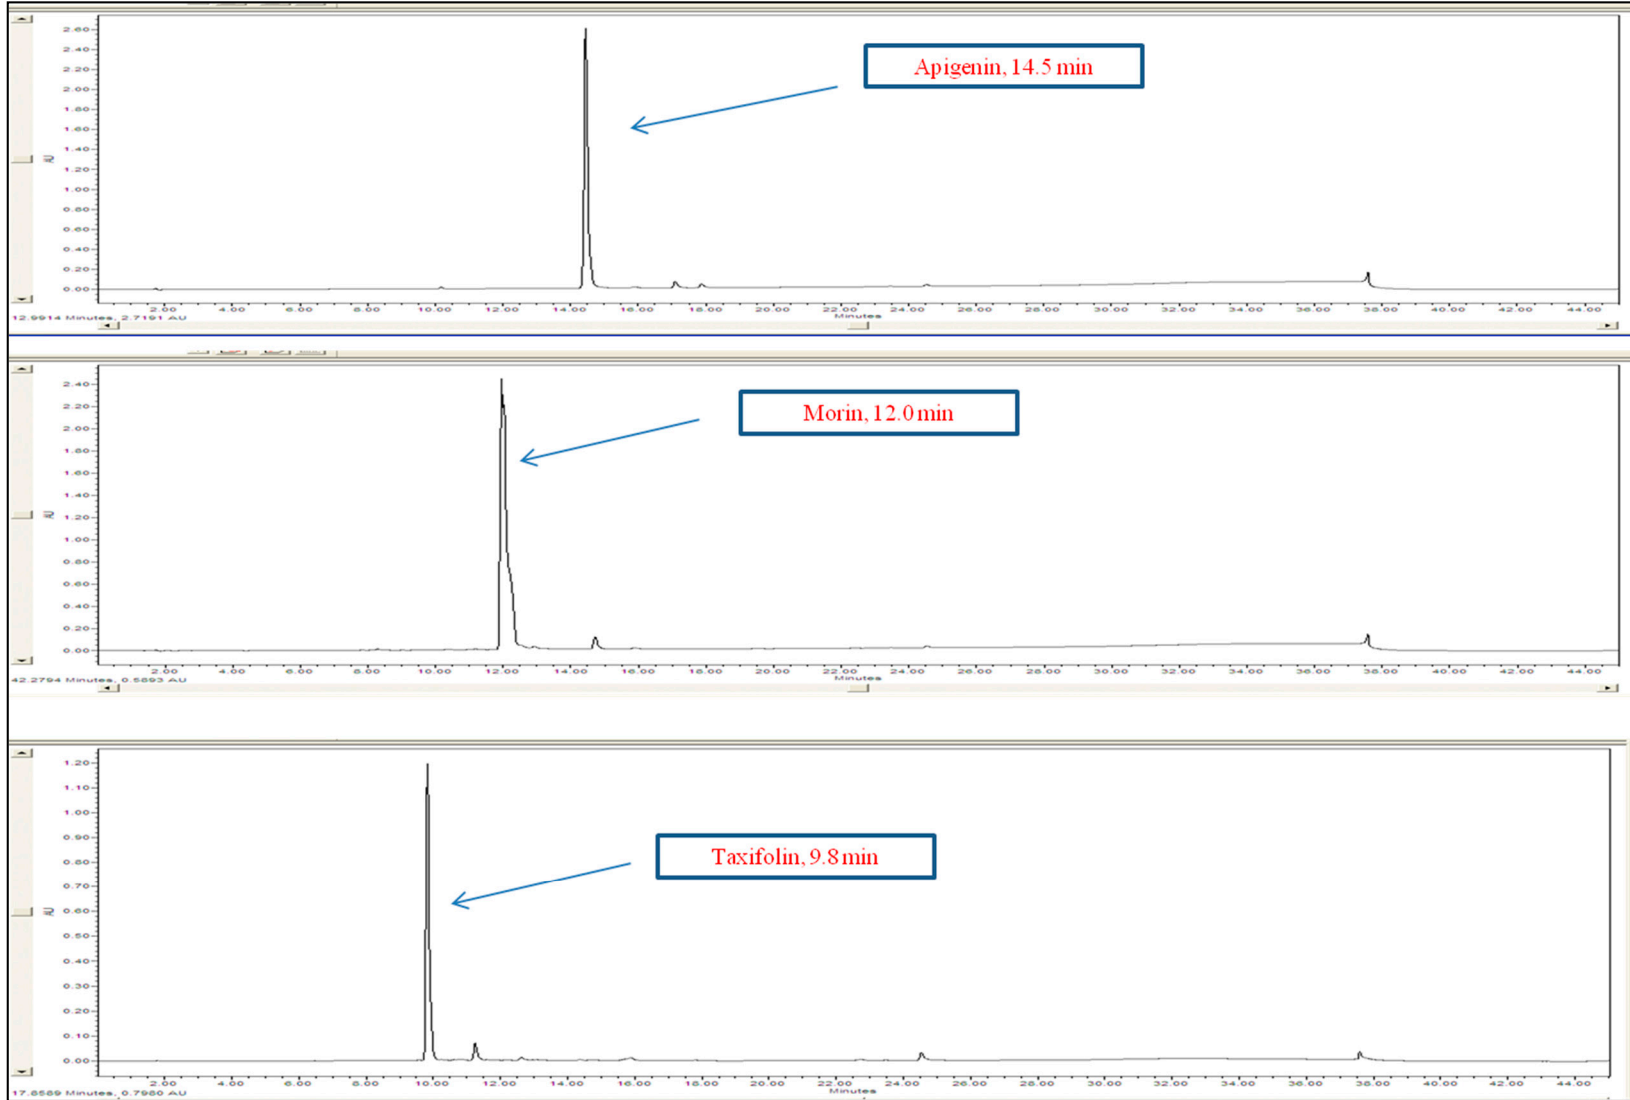

**Figure S4.** Individual HPLC Chromatograms for Quercetin and Galangin.

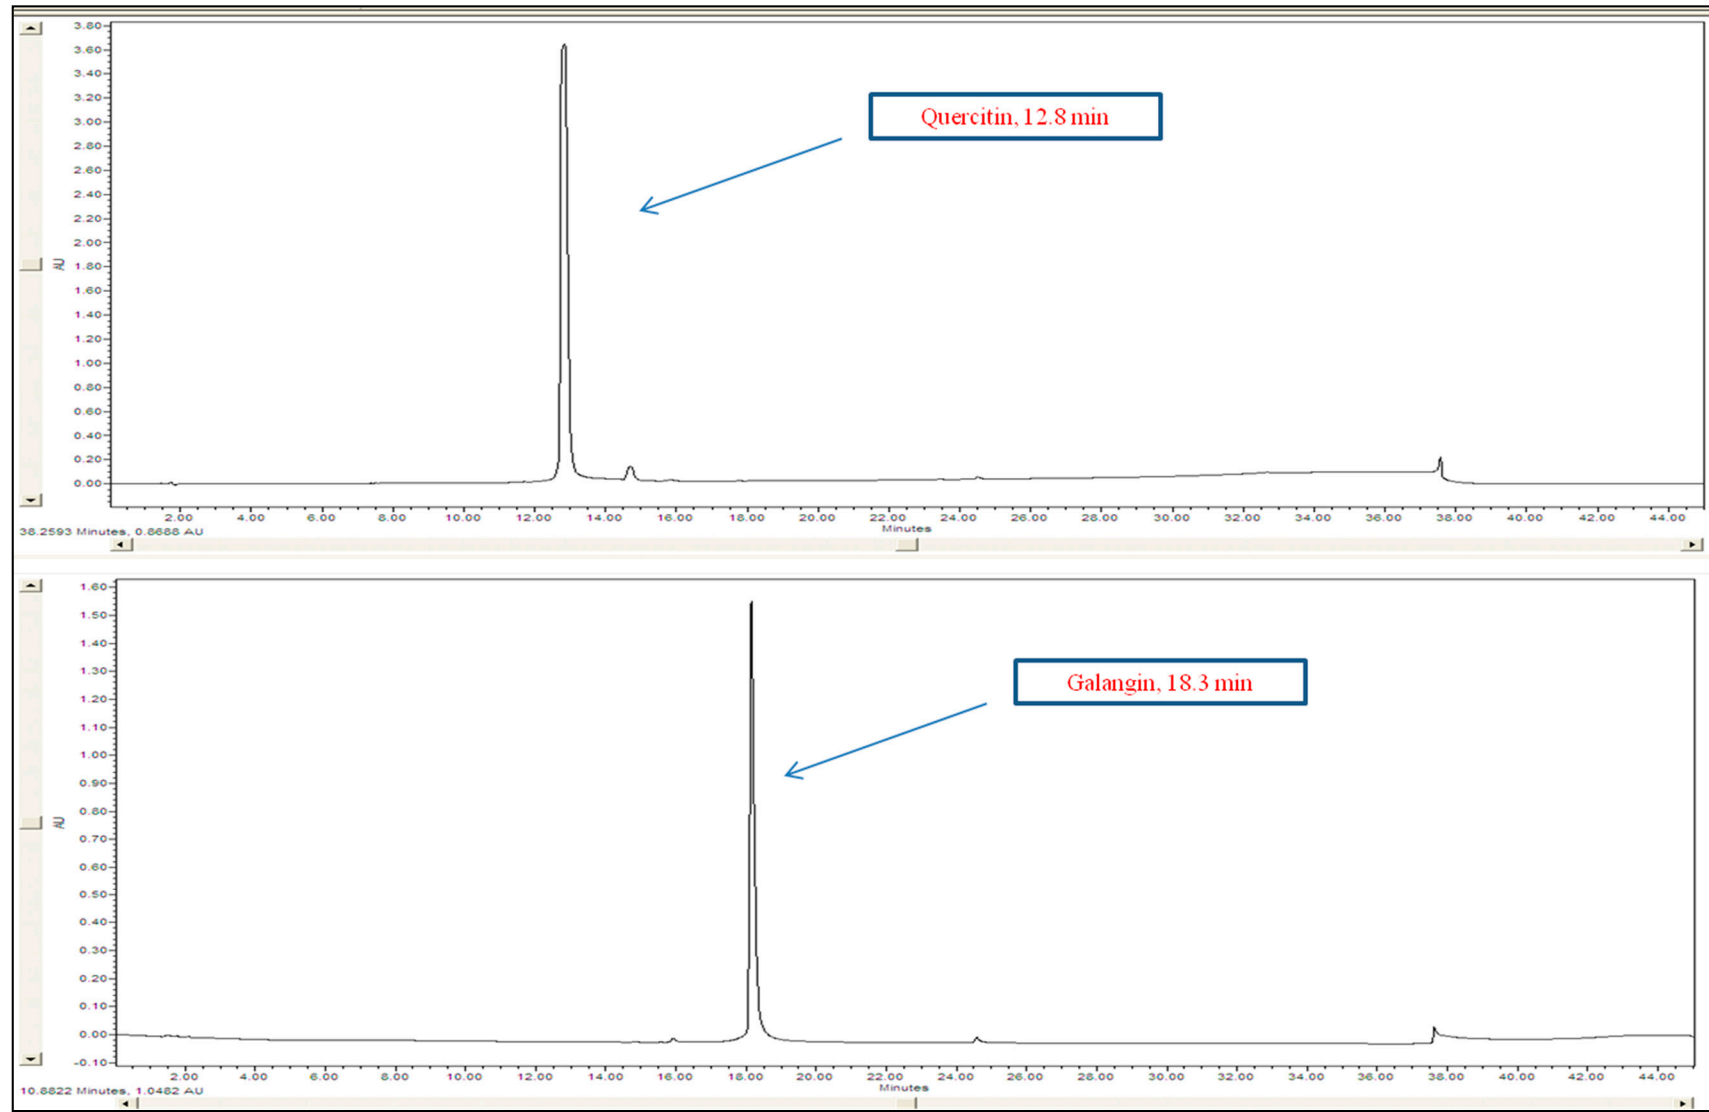

**Figure S5.** UHPLC/APCI-MS for the apigenin isolated from propolis.

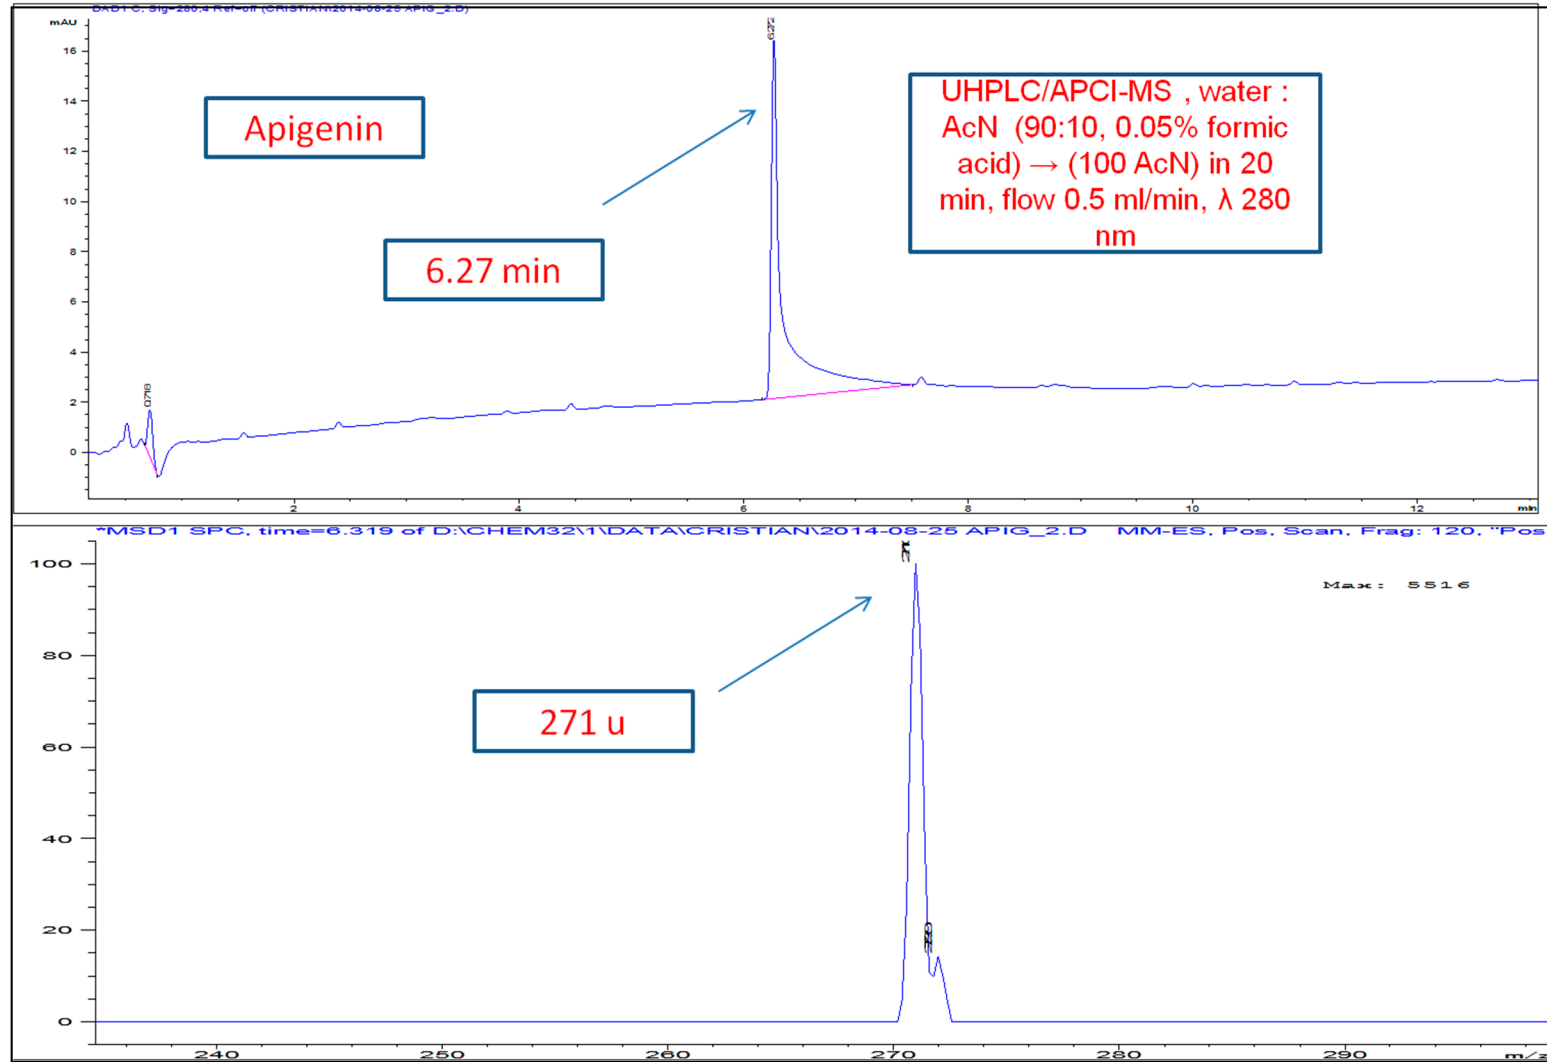

Figure S6. HRMS for the Apigenin isolated from propolis.

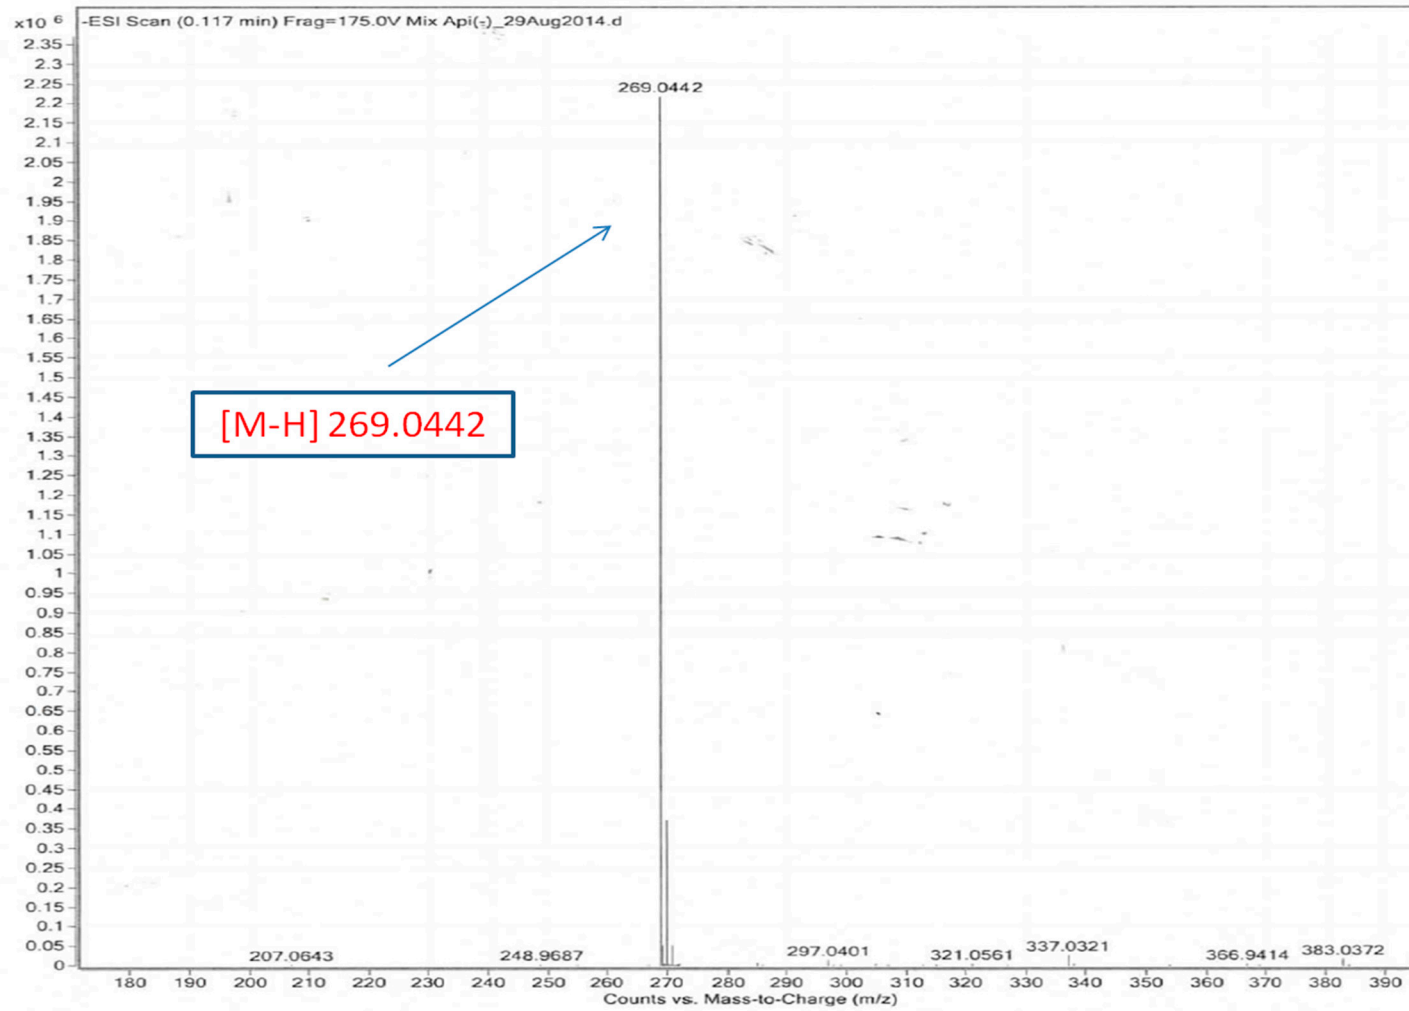

Figure S7. UHPLC/APCI-MS for the galangin isolated from propolis.

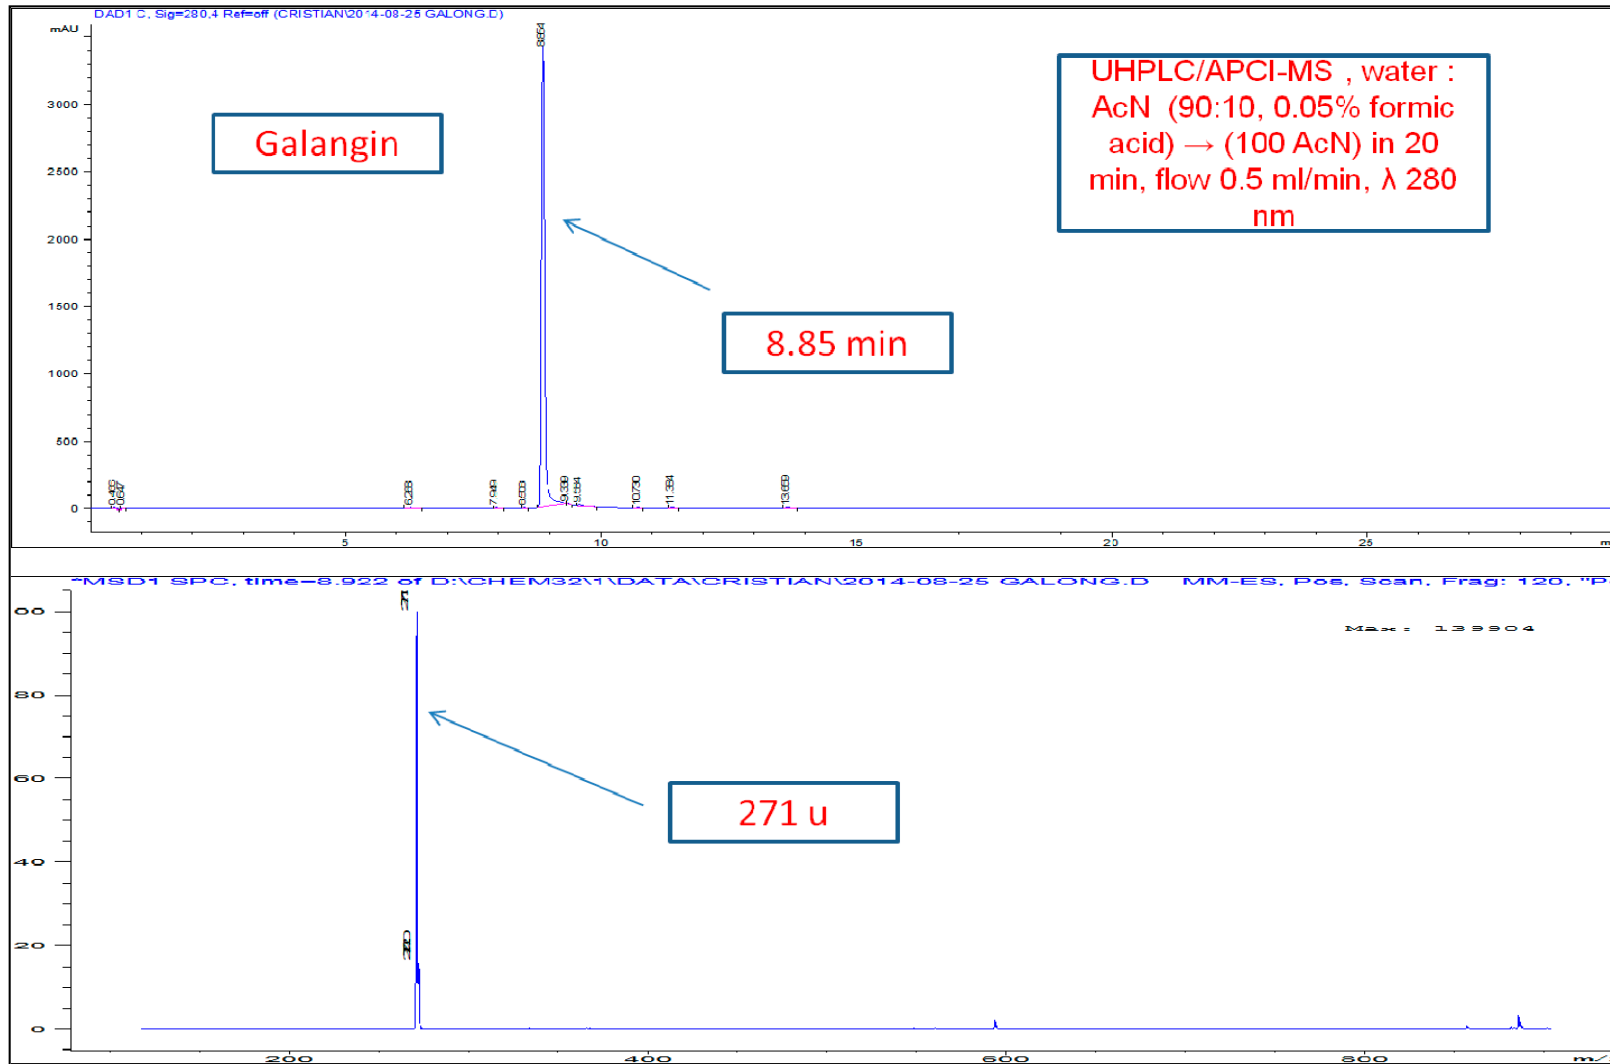

Figure S8. HRMS for galangin isolated from propolis.

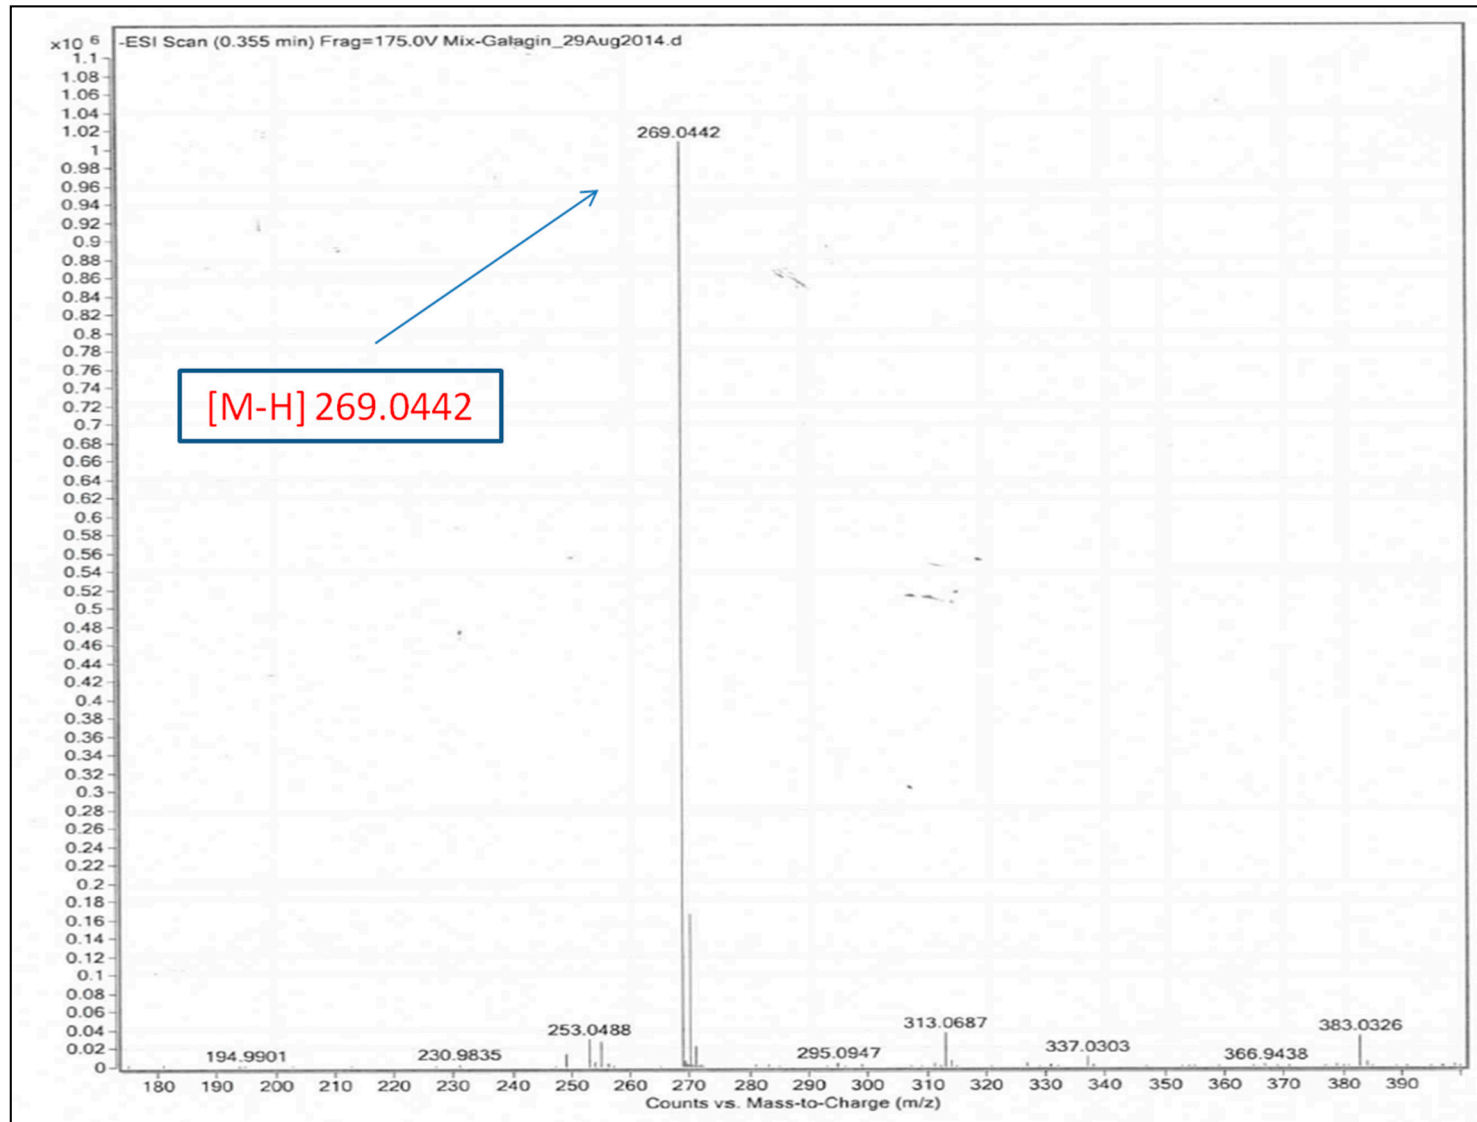

Supplement: molecules-19-18936-s001.pdf [file molecules-19-18936-s001.pdf]
